# Supplementary material
Source: MDPI journal article supplement (https://www.mdpi.com/2571-6255/5/6/180)
Supplement: s1 [file s1]

# SUPPLEMENTARY MATERIALS of *Burn severity drivers in Italian large wildfires*

**Table S1** - List of Landsat records used in the analysis (complete names of locations are listed in Table S2).

| Landsat sensor | WRS-2 Path/Row | Acquisition date (dd/mm/yyyy) | Landsat archive | Study area acronym                                                                        |
|----------------|----------------|-------------------------------|-----------------|-------------------------------------------------------------------------------------------|
| OLI            | 187/33         | 24/06/2017                    | USGS            | LON17; CAM17; CAN17                                                                       |
| OLI            | 187/33         | 13/07/2018                    | USGS            | LON17; CAM17; CAN17                                                                       |
| OLI            | 188/32         | 15/06/2017                    | USGS            | TRE17; EPI17; PAM17, SDT17; MOT17; MOG17; GDP17; TTA17; PAP17; MOM17; MAR17               |
| OLI            | 188/32         | 02/06/2018                    | USGS            | TRE17                                                                                     |
| OLI            | 188/32         | 06/09/2018                    | USGS            | EPI17; PAM17, SDT17; MOT17; MOG17; GDP17; TTA17; PAP17; MOM17                             |
| TM             | 188/33         | 19/07/2006                    | USGS            | MAL07; ACR07; SCO07; ACA07, CLE07; BAD07; SCI07, SCL07; SAA07; LON07; MES07               |
| TM             | 188/33         | 22/06/2008                    | USGS            | MAL07; ACR07; SCO07; ACA07, CLE07; BAD07; SCI07, SCL07; SAA07; LON07; MES07               |
| OLI            | 188/33         | 15/06/2017                    | USGS            | MLO17; GRI17; LTE17; DR117; DR217; AC217; ROS17; ROV17; DOM17; RCA17; PAL17; AC117; PIP17 |
| OLI            | 188/33         | 20/07/2018                    | USGS            | DR117; DR217; AC217; ROS17; ROV17; DOM17; RCA17; PAL17; AC117; PIP17                      |
| OLI            | 188/33         | 06/09/2018                    | USGS            | MLO17; GRI17; LTE17                                                                       |
| TM             | 188/34         | 05/09/2006                    | USGS            | CDS07; PAT07; MRE07, SMA07                                                                |
| TM             | 188/34         | 06/06/2008                    | USGS            | CDS07; PAT07; MRE07, SMA07                                                                |
| OLI            | 188/34         | 15/06/2017                    | USGS            | MES17; CDS17; EN217; CGU17                                                                |
| OLI            | 188/34         | 20/07/2018                    | USGS            | MES17; CDS17; EN217; CGU17                                                                |
| TM             | 189/31         | 24/06/2006                    | USGS            | SGL07; SDA07                                                                              |
| TM             | 189/31         | 13/07/2007                    | USGS            | MNF07; CAV07; VIE07; PES07; VAG07                                                         |
| TM             | 189/31         | 31/07/2008                    | USGS            | SGL07; SDA07; MNF07; CAV07; VIE07; PES07; VAG07                                           |
| OLI            | 189/31         | 08/07/2017                    | USGS            | SDA17; CAV17; PES17                                                                       |
| OLI            | 189/31         | 11/07/2018                    | USGS            | SDA17; CAV17; PES17                                                                       |
| TM             | 189/32         | 27/06/2007                    | USGS            | SAL07; CET07; TEG07; ASC07                                                                |
| TM             | 189/32         | 31/07/2008                    | USGS            | SAL07; CET07; TEG07; ASC07                                                                |
| OLI            | 189/32         | 22/06/2017                    | USGS            | MSS17, VEQ17; ROR17; SAL17; SGP17; SAT17                                                  |
| OLI            | 189/32         | 28/08/2018                    | USGS            | MAR17; MSS17; VEQ17; ROR17; SAL17; SGP17; SAT17                                           |
| TM             | 189/34         | 27/06/2007                    | USGS            | SSC07; COL07; MRL07; SCG07                                                                |
| TM             | 189/34         | 29/06/2008                    | USGS            | SSC07; COL07; MRL07; SCG07                                                                |
| OLI            | 189/34         | 08/07/2017                    | USGS            | EN117; BIS17; COR17                                                                       |
| OLI            | 189/34         | 11/07/2018                    | USGS            | EN117; BIS17; COR17                                                                       |
| TM             | 190/31         | 18/06/2007                    | USGS            | AQU07; NAV07; RMO07; ODM07; SER07                                                         |

|     |        |            |      |                                                                      |
|-----|--------|------------|------|----------------------------------------------------------------------|
| TM  | 190/31 | 18/08/2008 | USGS | AQU07; NAV07; RMO07; ODM07; SER07                                    |
| OLI | 190/31 | 13/06/2017 | USGS | ANT17; RAI17; SUL17; VNL17, SOR17; MOD17, CAR17; GVE17; FAI17; TDG17 |
| OLI | 190/31 | 02/07/2018 | USGS | ANT17; RAI17; SUL17; VNL17, SOR17; MOD17, CAR17; GVE17; FAI17; TDG17 |
| TM  | 190/34 | 04/07/2007 | USGS | SLM07; CUS07                                                         |
| TM  | 190/34 | 20/06/2008 | USGS | SLM07; CUS07                                                         |
| OLI | 190/34 | 13/06/2017 | USGS | CAR17; SVC17; CGO17; CSE17                                           |
| OLI | 190/34 | 18/07/2018 | USGS | CAR17; SVC17; CGO17; CSE17                                           |
| TM  | 191/30 | 25/06/2007 | USGS | ROC07; FAB07                                                         |
| TM  | 191/30 | 30/08/2008 | USGS | ROC07; FAB07                                                         |
| OLI | 191/30 | 20/06/2017 | USGS | URB17                                                                |
| OLI | 191/30 | 09/07/2018 | USGS | URB17                                                                |
| OLI | 192/30 | 11/06/2017 | USGS | MON17                                                                |
| OLI | 192/30 | 30/06/2018 | USGS | MON17                                                                |
| TM  | 192/32 | 18/07/2007 | USGS | ARZ07                                                                |
| TM  | 192/32 | 20/07/2008 | USGS | ARZ07                                                                |
| OLI | 192/32 | 27/06/2017 | USGS | VIS17                                                                |
| OLI | 192/32 | 30/06/2018 | USGS | VIS17                                                                |
| TM  | 192/33 | 18/07/2007 | USGS | VSA07                                                                |
| TM  | 192/33 | 04/07/2008 | USGS | VSA07                                                                |
| TM  | 193/32 | 23/06/2007 | USGS | NUO07; ARB07; PLO07                                                  |
| TM  | 193/32 | 25/06/2008 | USGS | NUO07; ARB07; PLO07                                                  |
| OLI | 193/32 | 04/07/2017 | USGS | ADS17; BUD17                                                         |
| OLI | 193/32 | 07/07/2018 | USGS | ADS17; BUD17                                                         |
| TM  | 193/33 | 09/07/2007 | USGS | PSC07; IGL07; SAN07; TEU07                                           |
| TM  | 193/33 | 12/08/2008 | USGS | PSC07; IGL07; SAN07; TEU07                                           |
| OLI | 193/33 | 04/07/2017 | USGS | ARB17                                                                |
| OLI | 193/33 | 07/07/2018 | USGS | ARB17                                                                |
| TM  | 194/29 | 16/07/2007 | USGS | VAR07                                                                |
| TM  | 194/29 | 19/08/2008 | USGS | VAR07                                                                |
| OLI | 194/29 | 25/08/2016 | USGS | MOC17                                                                |
| OLI | 194/29 | 30/07/2018 | USGS | MOC17                                                                |

---

**Table S2** - List of locations and main features of wildfires selected for the analysis. Geographic coordinates (WGS84) of fire centroids are expressed in decimal degrees. The name assigned to each fire event refers to the municipality where wildfire mostly occurred.

| ID | Location              | Acronym | Year | Region   | x<br>WGS84 | y<br>WGS84 | Area<br>ha | Perimeter<br>km |
|----|-----------------------|---------|------|----------|------------|------------|------------|-----------------|
| 1  | Moconesi              | MOC17   | 2017 | Liguria  | 9.21       | 44.44      | 235.6      | 24.8            |
| 2  | Varazze               | VAR07   | 2007 | Liguria  | 8.60       | 44.39      | 873.4      | 26.4            |
| 3  | Montale               | MON17   | 2017 | Toscana  | 11.02      | 43.95      | 330.6      | 20.4            |
| 4  | Urbino                | URB17   | 2017 | Marche   | 12.72      | 43.71      | 172.3      | 11.1            |
| 5  | Fabriano              | FAB07   | 2007 | Marche   | 12.86      | 43.32      | 533.9      | 41.3            |
| 6  | Roccafluvione         | ROC07   | 2007 | Marche   | 13.42      | 42.82      | 3,110.8    | 94.9            |
| 7  | Antrodoco             | ANT17   | 2017 | Lazio    | 13.10      | 42.43      | 1,149.1    | 34.6            |
| 8  | L'Aquila              | AQU07   | 2007 | Abruzzo  | 13.40      | 42.38      | 356.7      | 24.0            |
| 9  | Navelli               | NAV07   | 2007 | Abruzzo  | 13.75      | 42.22      | 7,349.3    | 217.2           |
| 10 | Roccamorice           | RMO07   | 2007 | Abruzzo  | 14.07      | 42.20      | 2,260.7    | 82.7            |
| 11 | Sulmona               | SUL17   | 2017 | Abruzzo  | 13.96      | 42.09      | 2,775.3    | 84.2            |
| 12 | Raiano                | RAI17   | 2017 | Abruzzo  | 13.81      | 42.08      | 310.1      | 21.8            |
| 13 | Ortona Dei Marzi      | ODM07   | 2007 | Abruzzo  | 13.72      | 41.99      | 461.7      | 33.4            |
| 14 | Peschici              | PES07   | 2007 | Apulia   | 16.04      | 41.94      | 781.9      | 29.8            |
| 15 | Peschici              | PES17   | 2017 | Apulia   | 16.05      | 41.90      | 257.2      | 20.3            |
| 16 | San Giovanni Lipioni  | SGL07   | 2007 | Abruzzo  | 14.59      | 41.85      | 140.9      | 15.4            |
| 17 | Vieste                | VIE07   | 2007 | Apulia   | 16.17      | 41.84      | 710.2      | 46.3            |
| 18 | Cagnano Varano        | CAV17   | 2017 | Apulia   | 15.72      | 41.82      | 529.6      | 24.3            |
| 19 | Cagnano Varano        | CAV07   | 2007 | Apulia   | 15.72      | 41.82      | 1,006.4    | 45.2            |
| 20 | Vico nel Lazio        | VNL17   | 2017 | Lazio    | 13.36      | 41.80      | 397.9      | 24.2            |
| 21 | Schiavi d'Abruzzo     | SDA07   | 2007 | Abruzzo  | 14.53      | 41.80      | 572.2      | 28.0            |
| 22 | Schiavi d'Abruzzo     | SDA17   | 2017 | Abruzzo  | 14.51      | 41.79      | 352.9      | 24.8            |
| 23 | Montorio nei Frentani | MNF07   | 2007 | Molise   | 14.91      | 41.75      | 506.7      | 22.0            |
| 24 | Sora                  | SOR17   | 2017 | Lazio    | 13.59      | 41.73      | 212.2      | 21.5            |
| 25 | Sermoneta             | SER07   | 2007 | Lazio    | 13.01      | 41.54      | 311.7      | 24.0            |
| 26 | Valle Agricola        | VAG07   | 2007 | Campania | 14.27      | 41.44      | 490.9      | 46.0            |
| 27 | Faicchio              | FAI17   | 2017 | Campania | 14.48      | 41.29      | 266.4      | 18.5            |
| 28 | Carinola              | CAR17   | 2017 | Campania | 13.95      | 41.21      | 241.8      | 16.9            |
| 29 | Giano Vetusto         | GVE17   | 2017 | Campania | 14.22      | 41.19      | 494.6      | 35.7            |
| 30 | Mondragone            | MOD17   | 2017 | Campania | 13.91      | 41.15      | 435.1      | 28.4            |
| 31 | Roccarainola          | ROR17   | 2017 | Campania | 14.50      | 40.99      | 399.4      | 22.8            |
| 32 | Ploaghe               | PLO07   | 2007 | Sardinia | 8.77       | 40.72      | 327.9      | 36.1            |
| 33 | Budoni                | BUD17   | 2017 | Sardinia | 9.68       | 40.74      | 374.5      | 17.1            |
| 34 | Alà dei Sardi         | ADS17   | 2017 | Sardinia | 9.38       | 40.70      | 1,965.2    | 69.0            |
| 35 | Torre del Greco       | TDG17   | 2017 | Campania | 14.42      | 40.82      | 3,168.4    | 101.6           |
| 36 | Gravina di Puglia     | GDP17   | 2017 | Apulia   | 16.40      | 40.75      | 1,708.6    | 47.8            |
| 37 | Mercato San Severino  | MSS17   | 2017 | Campania | 14.71      | 40.75      | 410.9      | 26.8            |
| 38 | Salerno               | SAL17   | 2017 | Campania | 14.80      | 40.72      | 174.6      | 17.2            |
| 39 | Salerno               | SAL07   | 2007 | Campania | 14.81      | 40.71      | 480.9      | 41.4            |
| 40 | Cetara                | CET07   | 2007 | Campania | 14.68      | 40.67      | 365.8      | 25.1            |
| 41 | Vico Equense          | VEQ17   | 2017 | Campania | 14.48      | 40.65      | 593.5      | 45.4            |
| 42 | Nuoro                 | NUO07   | 2007 | Sardinia | 9.26       | 40.35      | 7,473.5    | 187.4           |

|    |                            |       |      |            |       |       |         |       |
|----|----------------------------|-------|------|------------|-------|-------|---------|-------|
| 43 | Teggiano                   | TEG07 | 2007 | Campania   | 15.51 | 40.37 | 1,429.7 | 46.1  |
| 44 | Salento                    | SAT17 | 2017 | Campania   | 15.17 | 40.24 | 146.6   | 14.8  |
| 45 | Ascea                      | ASC07 | 2007 | Campania   | 15.20 | 40.17 | 510.4   | 39.4  |
| 46 | Episcopia                  | EPI17 | 2017 | Basilicata | 16.11 | 40.10 | 291.5   | 19.3  |
| 47 | San Giovanni a Piro        | SGP17 | 2017 | Campania   | 15.49 | 40.08 | 206.7   | 21.6  |
| 48 | Villagrande Strisaili      | VIS17 | 2017 | Sardinia   | 9.58  | 39.94 | 838.8   | 45.3  |
| 49 | Arzana                     | ARZ07 | 2007 | Sardinia   | 9.56  | 39.93 | 1,131.0 | 34.5  |
| 50 | Maratea                    | MAR17 | 2017 | Basilicata | 15.69 | 40.02 | 209.8   | 10.0  |
| 51 | Tortora                    | TTA17 | 2017 | Calabria   | 15.78 | 39.95 | 498.3   | 32.1  |
| 52 | Arbus                      | ARB07 | 2007 | Sardinia   | 8.46  | 39.72 | 220.4   | 13.6  |
| 53 | Praia a Mare               | PAM17 | 2017 | Calabria   | 15.81 | 39.90 | 504.4   | 45.2  |
| 54 | Papasidero                 | PAP17 | 2017 | Calabria   | 15.92 | 39.89 | 260.2   | 11.8  |
| 55 | Trebisacce                 | TRE17 | 2017 | Calabria   | 16.50 | 39.88 | 270.6   | 17.7  |
| 56 | Mormanno                   | MOM17 | 2017 | Calabria   | 15.97 | 39.88 | 250.3   | 11.3  |
| 57 | Santa Domenica Talao       | SDT17 | 2017 | Calabria   | 15.85 | 39.84 | 997.0   | 56.8  |
| 58 | Arbus                      | ARB17 | 2017 | Sardinia   | 8.52  | 39.50 | 2,133.0 | 111.5 |
| 59 | Mottafollone               | MOT17 | 2017 | Calabria   | 16.09 | 39.66 | 470.3   | 29.7  |
| 60 | Villasalto                 | VSA07 | 2007 | Sardinia   | 9.41  | 39.48 | 703.4   | 26.8  |
| 61 | Malvito                    | MAL07 | 2007 | Calabria   | 16.04 | 39.60 | 260.0   | 19.3  |
| 62 | Paludi                     | PAL17 | 2017 | Calabria   | 16.71 | 39.56 | 243.4   | 21.1  |
| 63 | Acri 1                     | AC117 | 2017 | Calabria   | 16.36 | 39.54 | 248.8   | 19.3  |
| 64 | Mongrassano                | MOG17 | 2017 | Calabria   | 16.11 | 39.54 | 451.1   | 23.9  |
| 65 | Pietrapaola                | PIP17 | 2017 | Calabria   | 16.81 | 39.47 | 279.5   | 23.1  |
| 66 | Acri                       | ACR07 | 2007 | Calabria   | 16.41 | 39.48 | 865.5   | 53.6  |
| 67 | Longobucco                 | LON17 | 2017 | Calabria   | 16.57 | 39.46 | 2,815.2 | 107.7 |
| 68 | Scala Coeli                | SCO07 | 2007 | Calabria   | 16.93 | 39.46 | 187.3   | 14.4  |
| 69 | Acri 2                     | AC217 | 2017 | Calabria   | 16.37 | 39.46 | 165.3   | 11.9  |
| 70 | Longobucco                 | LON07 | 2007 | Calabria   | 16.63 | 39.43 | 365.9   | 22.8  |
| 71 | Iglesias                   | IGL07 | 2007 | Sardinia   | 8.58  | 39.24 | 208.9   | 11.6  |
| 72 | Rose                       | ROS17 | 2017 | Calabria   | 16.36 | 39.39 | 1,946.5 | 82.9  |
| 73 | Portoscuso                 | PSC07 | 2007 | Sardinia   | 8.42  | 39.21 | 484.5   | 35.2  |
| 74 | Rovito                     | ROV17 | 2017 | Calabria   | 16.30 | 39.30 | 209.7   | 13.4  |
| 75 | Santadi                    | SAN07 | 2007 | Sardinia   | 8.74  | 39.11 | 296.6   | 16.2  |
| 76 | Domanico                   | DOM17 | 2017 | Calabria   | 16.19 | 39.21 | 186.7   | 17.2  |
| 77 | Teulada                    | TEU07 | 2007 | Sardinia   | 8.67  | 38.94 | 295.0   | 19.1  |
| 78 | Grimaldi                   | GRI17 | 2017 | Calabria   | 16.23 | 39.11 | 407.0   | 31.8  |
| 79 | Aiello Calabro             | ACA07 | 2007 | Calabria   | 16.23 | 39.10 | 1,610.2 | 66.0  |
| 80 | Cleto                      | CLE07 | 2007 | Calabria   | 16.17 | 39.08 | 353.8   | 28.6  |
| 81 | Martirano Lombardo         | MLO17 | 2017 | Calabria   | 16.20 | 39.07 | 287.8   | 16.2  |
| 82 | Lamezia Terme              | LTE17 | 2017 | Calabria   | 16.23 | 38.99 | 244.3   | 12.5  |
| 83 | Drapia 1                   | DR117 | 2017 | Calabria   | 15.91 | 38.67 | 250.2   | 19.7  |
| 84 | Drapia 2                   | DR217 | 2017 | Calabria   | 15.93 | 38.64 | 411.3   | 33.3  |
| 85 | Badolato                   | BAD07 | 2007 | Calabria   | 16.49 | 38.56 | 121.5   | 10.1  |
| 86 | Santa Caterina dello Ionio | SCI07 | 2007 | Calabria   | 16.50 | 38.53 | 451.4   | 28.7  |
| 87 | Camini                     | CAM17 | 2017 | Calabria   | 16.47 | 38.43 | 107.8   | 8.4   |
| 88 | Canolo                     | CAN17 | 2017 | Calabria   | 16.18 | 38.34 | 411.8   | 26.6  |
| 89 | Messina                    | MES07 | 2007 | Sicily     | 15.54 | 38.25 | 1,318.0 | 77.6  |

|     |                             |        |      |          |       |       |         |       |
|-----|-----------------------------|--------|------|----------|-------|-------|---------|-------|
| 90  | Scilla                      | SCL07  | 2007 | Calabria | 15.78 | 38.24 | 829.0   | 52.1  |
| 91  | Messina                     | MES17  | 2017 | Sicily   | 15.54 | 38.24 | 641.4   | 32.6  |
| 92  | Sant' Alessio in Aspromonte | SAA07  | 2007 | Calabria | 15.77 | 38.18 | 347.5   | 33.8  |
| 93  | San Vito Lo Capo            | SVC17  | 2017 | Sicilia  | 12.77 | 38.10 | 3,742.4 | 70.0  |
| 94  | Carini                      | CAR17  | 2017 | Sicilia  | 13.21 | 38.11 | 583.9   | 31.8  |
| 95  | Reggio Calabria             | RCA17  | 2017 | Calabria | 15.74 | 38.11 | 309.1   | 20.0  |
| 96  | Patti                       | PAT07  | 2007 | Sicily   | 15.04 | 38.11 | 1,666.0 | 94.8  |
| 97  | Montagnareale               | MRE07  | 2007 | Sicily   | 14.93 | 38.10 | 1,303.0 | 104.0 |
| 98  | Monreale                    | MRL07  | 2007 | Sicily   | 13.21 | 38.08 | 2,794.6 | 147.8 |
| 99  | Custonaci                   | CUS07  | 2007 | Sicily   | 12.76 | 38.06 | 1,116.5 | 43.3  |
| 100 | San Marco d'Alunzio         | SMA07  | 2007 | Sicily   | 14.71 | 38.06 | 1,511.4 | 71.6  |
| 101 | Castellammare del Golfo     | CGO17  | 2017 | Sicily   | 12.86 | 38.02 | 651.4   | 26.6  |
| 102 | Santo Stefano di Camastra   | SSC07  | 2007 | Sicily   | 14.37 | 37.99 | 1,921.7 | 83.3  |
| 103 | Santa Cristina Gela         | SCGR07 | 2007 | Sicily   | 13.38 | 37.96 | 301.3   | 20.8  |
| 104 | Collesano                   | COL07  | 2007 | Sicily   | 13.96 | 37.96 | 5,087.4 | 157.1 |
| 105 | Calatafini-Segesta          | CSE17  | 2017 | Sicily   | 12.88 | 37.94 | 138.2   | 11.2  |
| 106 | Salemi                      | SLM07  | 2007 | Sicily   | 12.79 | 37.86 | 402.5   | 29.8  |
| 107 | Castiglione di Sicilia      | CDS07  | 2007 | Sicily   | 15.05 | 37.85 | 554.9   | 25.8  |
| 108 | Corleone                    | COR17  | 2017 | Sicily   | 13.36 | 37.84 | 686.0   | 28.9  |
| 109 | Castiglione di Sicilia      | CDS17  | 2017 | Sicily   | 15.05 | 37.85 | 288.9   | 15.6  |
| 110 | Bisacquino                  | BIS17  | 2017 | Sicily   | 13.28 | 37.72 | 953.4   | 36.2  |
| 111 | Enna 1                      | EN117  | 2017 | Sicily   | 14.32 | 37.45 | 654.8   | 31.0  |
| 112 | Enna 2                      | EN217  | 2017 | Sicily   | 14.39 | 37.44 | 3,610.4 | 106.9 |
| 113 | Chiaramonte Gulfi           | CGU17  | 2017 | Sicily   | 14.70 | 37.02 | 840.5   | 77.1  |

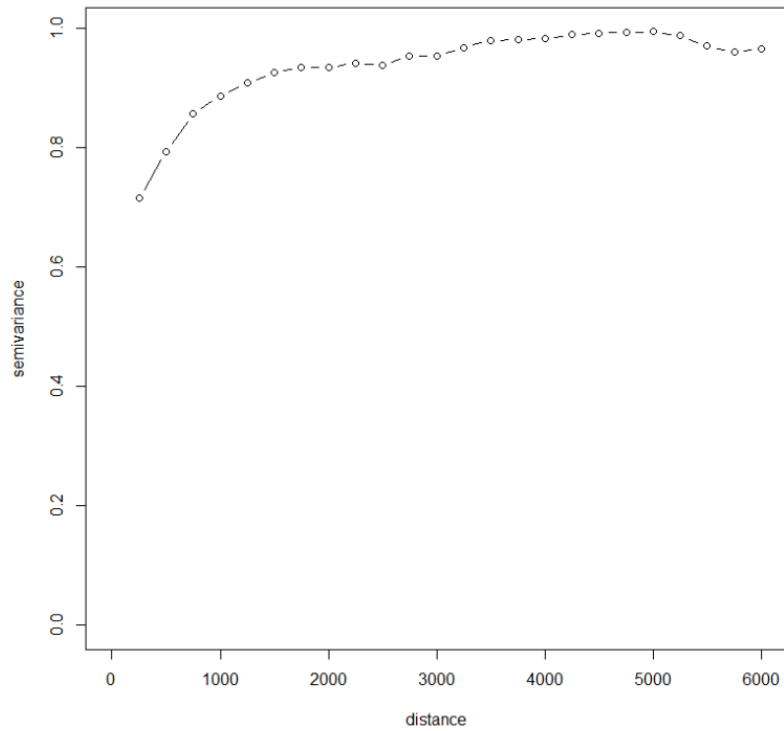

Figure S1 - Semivariogram of the random forest model residuals. The semivariance was divided by the sample variance.

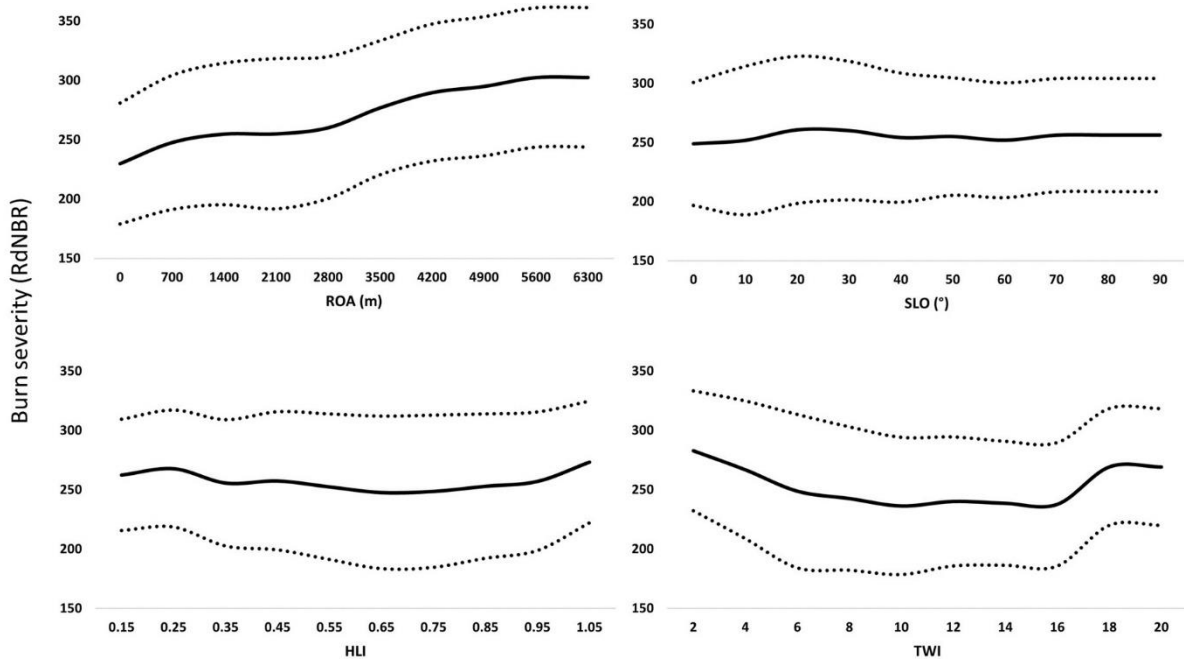

Figure S2 – Partial dependence plots showing relative influences of the four predictors with lower important rate of burn severity across the respective input data ranges. Solid lines indicate the average over individual marginal effects of each selected explanatory variable (ROA = distance to roads; SLO = slope; HLI = Heat Load Index ; TWI = Topographic wetness index) whereas dotted lines are the standard deviations of individual marginal effects ( $\pm 1$ SD).
